# Supplementary material for: Carbon Quantum Dots Prepared with Chitosan for Synthesis of CQDs/AuNPs for Iodine Ions Detection
Source: MDPI journal article supplement (doi:10.3390/nano8121043), 2018-12-13
Supplement: s1 [file s1]

# Supplementary Information

## Carbon Quantum Dots Prepared with Chitosan for Synthesis of CQDs/AuNPs for Iodine Ions Detection

Juanjuan Song <sup>1,†</sup>, Li Zhao <sup>1,†</sup>, Yesheng Wang <sup>1</sup>, Yun Xue <sup>1</sup>, Yujia Deng <sup>1</sup>, Xihui Zhao <sup>1,2,\*</sup> and Qun Li <sup>1,2</sup>

<sup>1</sup> School of Chemistry and Chemical Engineering, Qingdao University, Qingdao 266071, China; songjuan2017@163.com (J.S.); 2017020829@qdu.edu.cn (L.Z.); 2016020405@qdu.edu.cn (Y.W.); xueyun@qdu.edu.cn (Y.X.); dengyujia@qdu.edu.cn (Y.D.); qunli@qdu.edu.cn (Q.L.)

<sup>2</sup> State Key Laboratory of Bio-Fibers and Eco-Textiles, Shandong Collaborative Innovation Center of Marine Biobased Fibers and Ecological Textiles, Institute of Marine Biobased Materials, Qingdao University, Qingdao 266071, China

\* Correspondence: zhaoxihui@qdu.edu.cn; Tel.: +86-0532-85955529

† These authors contributed equally to this work.

### Test method for deacetylation degree of chitosan:

The degree of deacetylation (DD) of chitosan was determined by titration as follows:

0.20 g vacuum-dried sample was dispersed in 20 mL, 0.1 mol/L HCl and then titrated with 0.1 mol/L NaOH. The pH value and corresponding volume of NaOH solution was recorded and a titration curve was plotted. This plot had two inflection points, where the corresponding volumes were recorded as V1 and V2. The DD value was calculated according to the following equation

$$\text{Degree of deacetylation (DD)} = ((V2-V1) \times c \times 0.016) / (0.094 \times W) \quad (1)$$

Where c is the concentration of NaOH solution, and W is the sample weight (g).

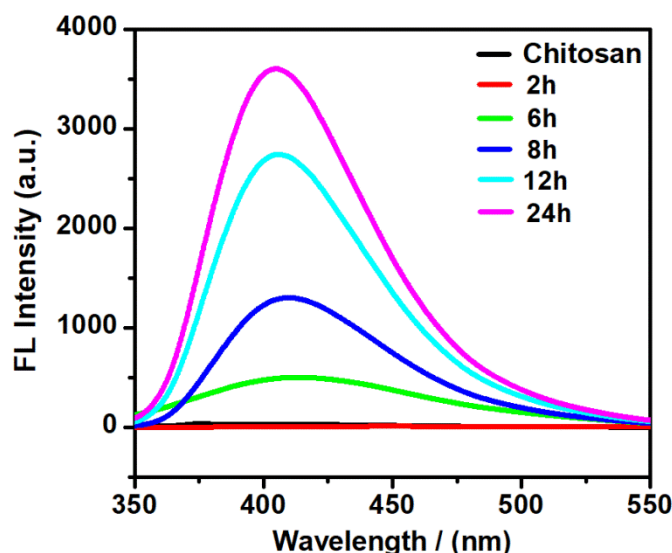

Figure S1 Fluorescence emission spectra of CQDs obtained by chitosan hydrothermal carbonization with different times (at a maximum excitation wavelength of 330 nm).

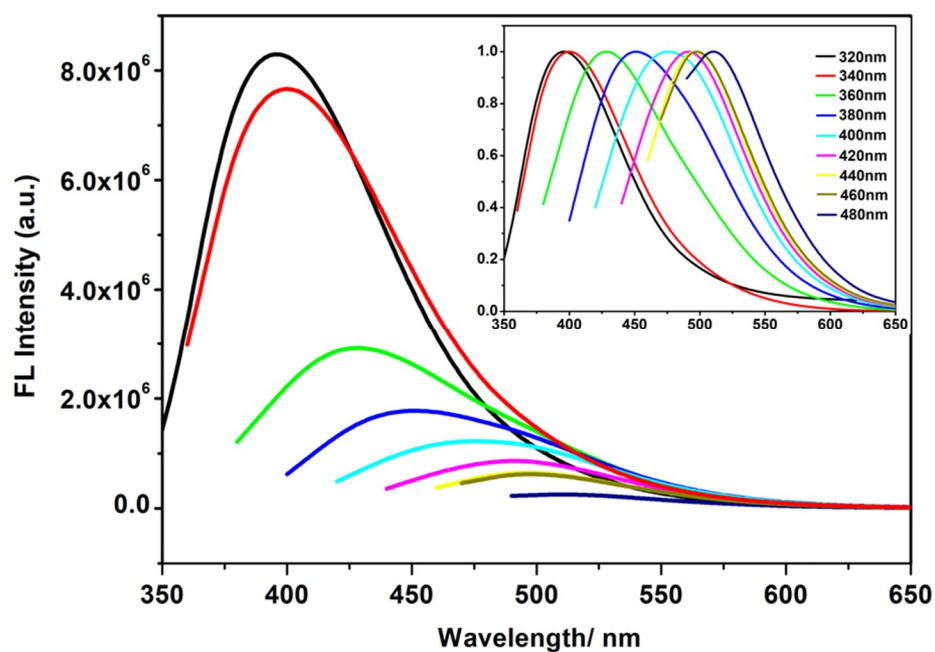

Figure S2 Fluorescence emission spectra of the CQDs obtained under excitations from 280 to 480 nm with 20 nm interval. Inset: Normalized Fluorescence emission spectra.

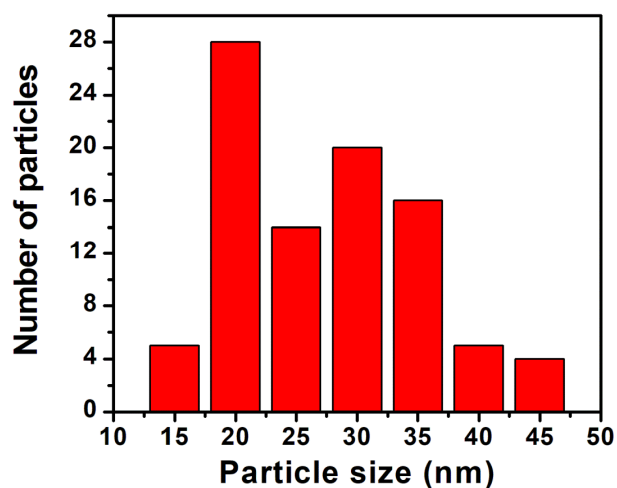

Figure S3 size distribution histogram of CQDs/AuNPs.

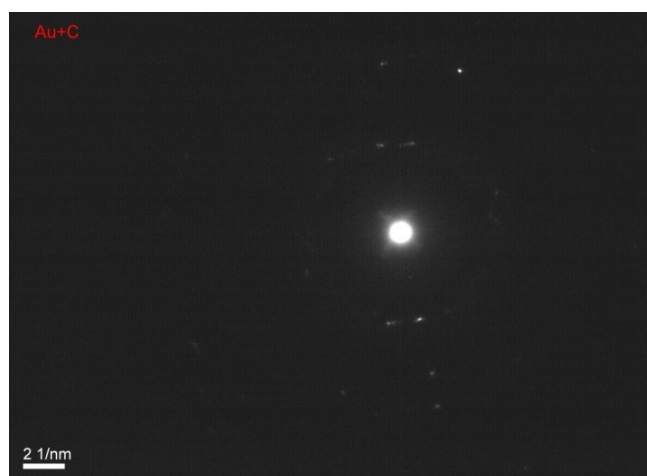

Figure S4 SAED of CQDs/AuNPs.

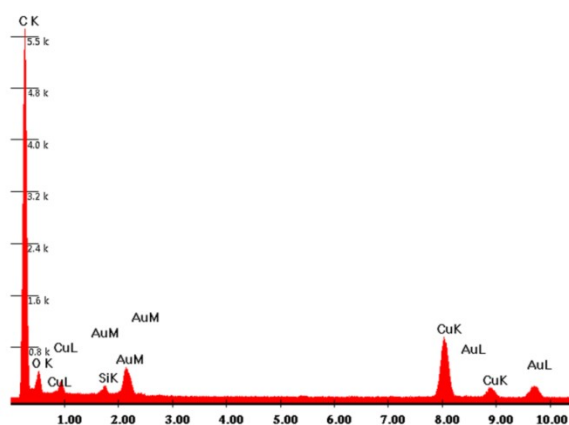

Figure S5 Energy dispersive X-ray spectrum (EDS) of the CQDs/AuNPs showing the peaks for C, O, Cu and Au.

Table S1 Results for the determination of iodide in salt samples (n=3).

| Sample | Spiked ( $\mu\text{M}$ ) | Measured ( $\mu\text{M}$ ) | Recovery (%) |
|--------|--------------------------|----------------------------|--------------|
| salt   | 0                        | -                          | -            |
|        | 5                        | 4.92                       | 98.4         |
|        | 10                       | 10.74                      | 107.4        |
|        | 20                       | 21.10                      | 105.5        |

Table S2 Comparison of the proposed iodide detection method with other reported methods.

| Methods                   | Probe                                                      | Linear range/(M)                               | LOD/(M)               | Ref.      |
|---------------------------|------------------------------------------------------------|------------------------------------------------|-----------------------|-----------|
| Colorimetric              | ATTP-AuNPs                                                 | $5.0 \times 10^{-7}$ to $6.0 \times 10^{-6}$   | $1.5 \times 10^{-8}$  | [2]       |
| Fluorescence              | N-CQDs                                                     | $1 \times 10^{-4}$ to $2.0 \times 10^{-3}$     | $1.0 \times 10^{-5}$  | [17]      |
| Colorimetric              | Cu@Au Nanoparticles                                        | —                                              | $5.0 \times 10^{-6}$  | [S1]      |
| Colorimetric              | FCD                                                        | —                                              | $4.3 \times 10^{-7}$  | [S2]      |
| Fluorescence              |                                                            |                                                |                       |           |
| Turn off and colorimetric | $\text{C}_{20}\text{H}_{20}\text{N}_4\text{O}_5$           | $6.25 \times 10^{-6}$ to $3.12 \times 10^{-5}$ | $3 \times 10^{-8}$    | [S3]      |
| Colorimetric              | $\text{C}_{22}\text{H}_{22}\text{N}_4\text{O}_6\text{S}_2$ | —                                              | $5.31 \times 10^{-6}$ | [S4]      |
| Fluorescence              | FITC-Au nanoparticles                                      | $1.0 \times 10^{-7}$ – $1.0 \times 10^{-6}$    | $5 \times 10^{-8}$    | [S5]      |
| Colorimetric              | silver nanoparticles                                       | $6.0 \times 10^{-6}$ – $8.0 \times 10^{-6}$    | $2.5 \times 10^{-4}$  | [S6]      |
| Colorimetric              | CQDs/AuNPs                                                 | $2.0 \times 10^{-5}$ – $4.0 \times 10^{-4}$    | $2.3 \times 10^{-6}$  | This work |

## References

- S1. Zhang, J.; Xu, X.; Yang, C.; Yang, F.; Yang, X. Colorimetric iodide recognition and sensing by citrate-stabilized Core/shell Cu@Au nanoparticles. *Anal. Chem.* **2011**, *83*, 3911–3917.
- S2. Jafari, M.; Badiei, A.; Shayesteh, A.; Amiri, A. Fluorescent and colorimetric dual mode probe for detection of iodide through iodide/triiodide equilibrium. *J. Photochem. Photobiol. A Chem.* **2018**, *364*, 336–343.
- S3. Thakur, A.; Bhatta, S. R.; Mondal, B.; Kakash, D.; Chawla, P. Naphthalene-glycine conjugate: An extremely selective colorimetric chemosensor for iodide ion in aqueous solution. *Sensors Actuators, B Chem.* **2018**, *267*, 617–626.
- S4. Goh, H.; Nam, T. K.; Singh, A.; Singh, N.; Jang, D. O. Dipodal colorimetric sensor for  $\text{Ag}^+$  and its resultant complex for iodide sensing using a cation displacement approach in water. *Tetrahedron Lett.* **2017**, *58*, 1040–1045.
- S5. Wei, S. C.; Hsu, P. H.; Lee, Y. F.; Lin, Y. W.; Huang, C. C. Selective detection of iodide and cyanide anions using gold-nanoparticle-based fluorescent probes. *ACS Appl. Mater. Interfaces* **2012**, *4*, 2652–2658.
- S6. Kumar, A.; Chhatra, R. K.; Pandey, P. S. Synthesis of click bile acid polymers and their application in stabilization of silver nanoparticles showing iodide sensing property. *Org. Lett.* **2010**, *12*, 24–27.
